# Supplementary material for: Two-step reduction of self-assembed three-dimensional (3D) reduced graphene oxide (RGO)/zinc oxide (ZnO) nanocomposites for electromagnetic absorption
Source: Royal Society of Chemistry journal article supplement (doi:10.1039/c4ta04959d), 2014-01-01
Supplement: c4ta04959d1.pdf [file c4ta04959d1.pdf]

### Electronic Supplementary Information

Sample-1

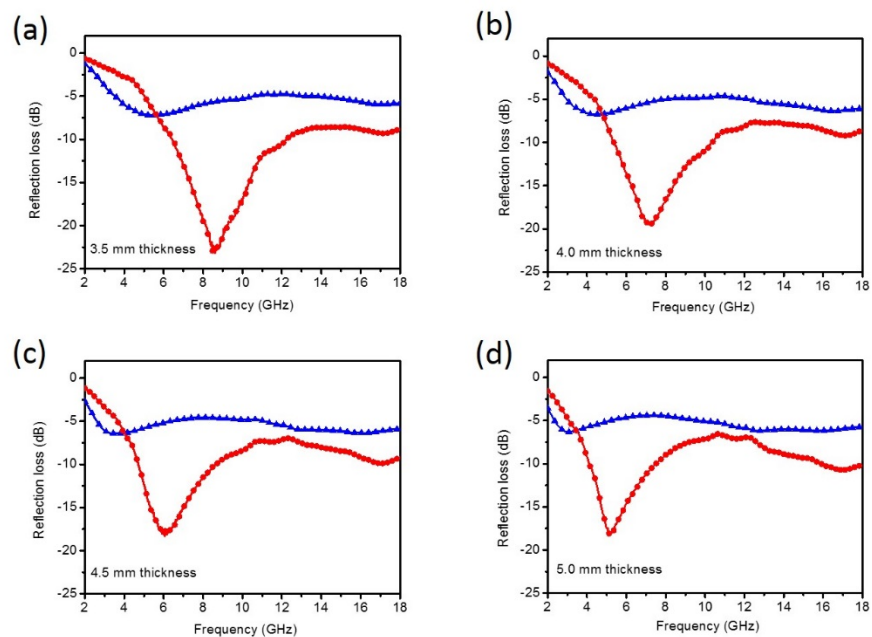

Sample-2

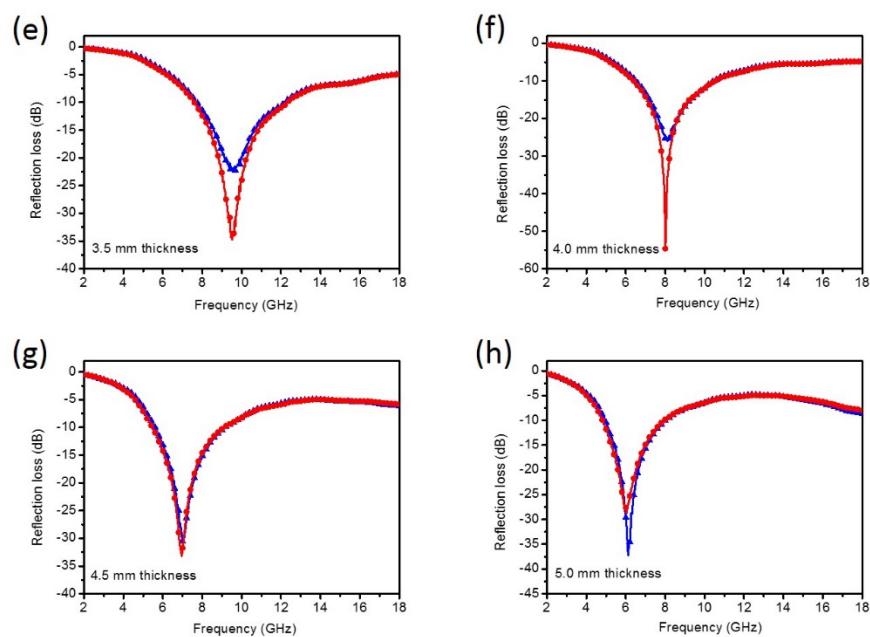

**Figure S1.** Reflection loss curves of sample-1 (a, b, c, d) and sample-2 (e, f, g, h) with the thickness of 3.5, 4.0, 4.5 and 5.0 mm in the frequency range of 2-18 GHz before (blue) and after (red) UV-irradiation.

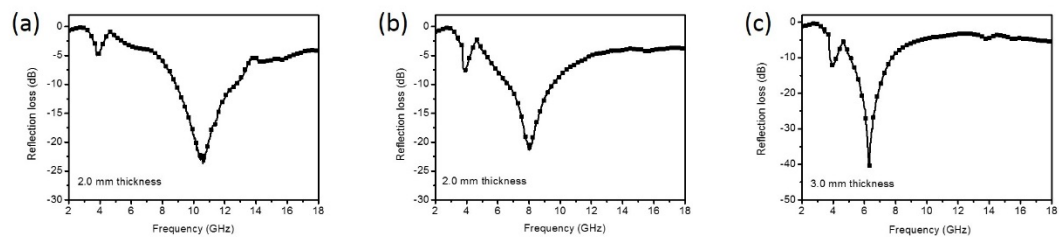

**Figure S2.** Reflection loss curves of sample-1 with the thickness of 2.0, 2.5 and 3.0 mm in the frequency range of 2-18 GHz after UV-irradiation (20.0 wt% in paraffin matrix).
